# Supplementary material for: Phenotypic Consequences of SLC25A40-ABCB1 Fusions beyond Drug Resistance in High-Grade Serous Ovarian Cancer
Source: MDPI journal article supplement (doi:10.3390/cancers13225644), 2021-11-11
Supplement: s1 [file s1]

**A**

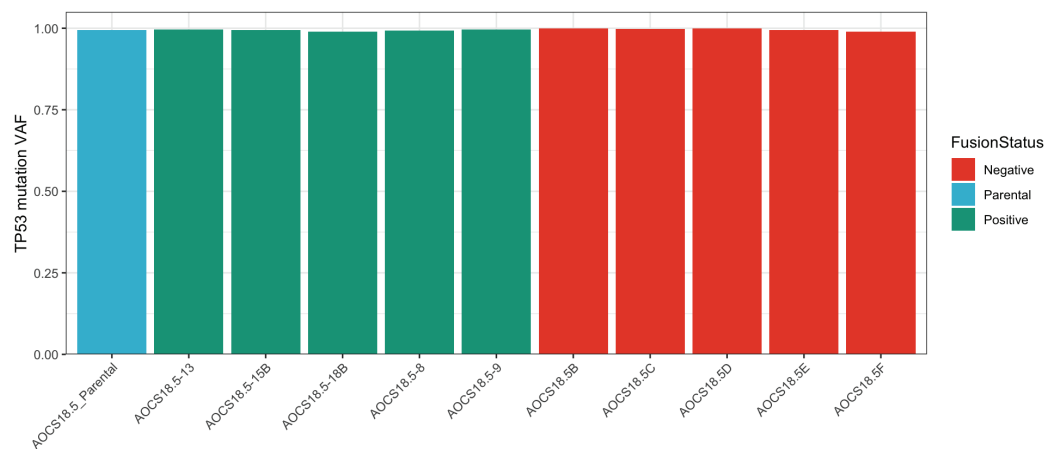

**B**

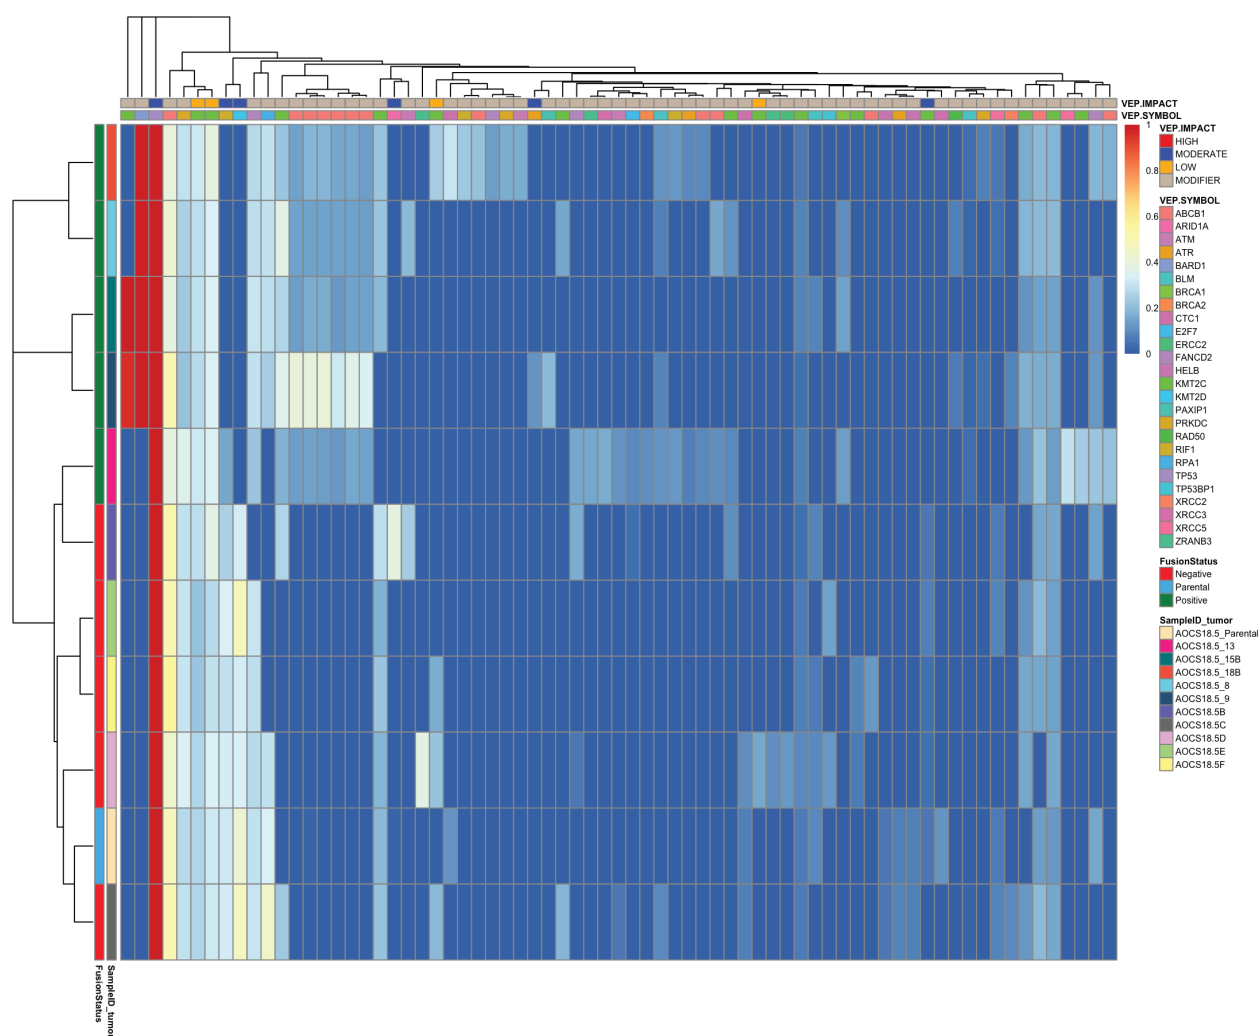

**Supplementary Fig. S4.** Mutational analysis of AOCs18.5 lines identifies similarities and differences between fusion positive and negative clones.

(A) A single high variant (ENSP00000269305.4:p.Lys132Met) was identified in TP53 in all AOCs18.5 lines (parental and clones), with variant allele frequencies (VAF) >98%. (B) A heatmap of the VAF of all mutations detected sees the fusion positive clones clustering together and the fusion negative clones clustering with the parental line.
