# Supplementary material for: Phenotypic Consequences of SLC25A40-ABCB1 Fusions beyond Drug Resistance in High-Grade Serous Ovarian Cancer
Source: MDPI journal article supplement (doi:10.3390/cancers13225644), 2021-11-11
Supplement: s1 [file s1]

**Supplementary Table 2:** Drug hits from primary FDA screening.

| Hit | QCL Sample Number | Compound ID                     | # Hit Dose Points |
|-----|-------------------|---------------------------------|-------------------|
| 1   | SN01006065        | TRIPTOLIDE                      | 3                 |
| 2   | SN01004975        | TENIPOSIDE                      | 3                 |
| 3   | SN01005284        | PROSCILLARIDIN_A                | 3                 |
| 4   | SN01005428        | PODOFILOX                       | 3                 |
| 5   | SN00852776        | PACLITAXEL                      | 3                 |
| 6   | SN00846426        | HARRINGTONINE                   | 3                 |
| 7   | SN01004313        | EMETINE_DIHYDROCHLORIDE         | 3                 |
| 8   | SN00852833        | DOCETAXEL                       | 3                 |
| 9   | SN01005867        | CONVALLATOXIN                   | 3                 |
| 10  | SN01004261        | COLCHICINE                      | 3                 |
| 11  | SN00852795        | 7-ETHYL-10-HYDROXYCAMPTOTHECIN  | 3                 |
| 12  | SN00852856        | 10-HYDROXYCAMPTOTHECIN          | 3                 |
| 13  | SN00844674        | VINCRIStINE_SULFATE             | 2                 |
| 14  | SN01006021        | VERATRINE_HYDROCHLORIDE         | 2                 |
| 15  | SN01004936        | TOPOTECAN_HYDROCHLORIDE         | 2                 |
| 16  | SN00844679        | TOPOTECAN_HCL                   | 2                 |
| 17  | SN01006261        | PODOPHYLLIN_ACETATE             | 2                 |
| 18  | SN01006517        | PATULIN                         | 2                 |
| 19  | SN01005684        | OUABAIN_OCTAHYDRATE             | 2                 |
| 20  | SN01005436        | NOCODAZOLE                      | 2                 |
| 21  | SN01004872        | MITOXANTRONE_HYDROCHLORIDE      | 2                 |
| 22  | SN00852733        | MITOXANTHRONE_HCL               | 2                 |
| 23  | SN01004680        | LANATOSIDE_C                    | 2                 |
| 24  | SN00838677        | IRINOTECAN_HCL_(TRIHYDRATE)     | 2                 |
| 25  | SN00852772        | DOXORUBICIN_HCL                 | 2                 |
| 26  | SN01004295        | DIGOXIN                         | 2                 |
| 27  | SN01004294        | DIGITOXIN                       | 2                 |
| 28  | SN00852835        | DASATINIB                       | 2                 |
| 29  | SN01005375        | DACTINOMYCIN                    | 2                 |
| 30  | SN01004272        | CYTARABINE                      | 2                 |
| 31  | SN00838624        | CERIVASTATIN_NA                 | 2                 |
| 32  | SN00838664        | CERIVASTATIN_LACTONE            | 2                 |
| 33  | SN01005979        | CAMPTOTHECIN                    | 2                 |
| 34  | SN00838731        | ATROSCINE_HBR                   | 2                 |
| 35  | SN01004861        | AMSACRINE                       | 2                 |
| 36  | SN01005834        | 4-DEMETHYLEPICROPODOPHYLLOTOXIN | 2                 |
| 37  | SN00852845        | VORINOSTAT                      | 1                 |
| 38  | SN00844643        | VINORELBINE_BITATRATE           | 1                 |
| 39  | SN00844658        | VINBLASTINE_SULFATE             | 1                 |
| 40  | SN01005668        | TIOGUANINE                      | 1                 |
| 41  | SN01004535        | THIMEROSAL                      | 1                 |
| 42  | SN01006263        | TANSHINONE_IIA                  | 1                 |
| 43  | SN01004875        | SULFANILATE_ZINC                | 1                 |

|    |            |                                       |   |
|----|------------|---------------------------------------|---|
| 44 | SN01005894 | STROPHANTHIDINIC_ACID_LACTONE_ACETATE | 1 |
| 45 | SN01006189 | STROPHANTHIDIN_ACETATE                | 1 |
| 46 | SN01006499 | STROPHANTHIDIN                        | 1 |
| 47 | SN01005689 | SECURININE                            | 1 |
| 48 | SN01006250 | SAPPANONE_A_DIMETHYL_ETHER            | 1 |
| 49 | SN01004179 | SANGUINARIUM_CHLORIDE                 | 1 |
| 50 | SN00846304 | RUBITECAN                             | 1 |
| 51 | SN01006342 | ROTENONE                              | 1 |
| 52 | SN01004994 | RIVAROXABAN                           | 1 |
| 53 | SN01004304 | PYRITHIONE_ZINC                       | 1 |
| 54 | SN01004633 | PUROMYCIN_DIHYDROCHLORIDE             | 1 |
| 55 | SN01004478 | PRIMAQUINE_PHOSPHATE                  | 1 |
| 56 | SN01004946 | PIROCTONE_OLAMINE                     | 1 |
| 57 | SN01006529 | PICROPODOPHYLLIN                      | 1 |
| 58 | SN01004576 | PHENYLMERCURIC_ACETATE                | 1 |
| 59 | SN01005833 | PARTHENOLIDE                          | 1 |
| 60 | SN00846327 | OXYMETHOLONE                          | 1 |
| 61 | SN01004881 | OXIBENDAZOLE                          | 1 |
| 62 | SN01004866 | NICLOSAMIDE                           | 1 |
| 63 | SN01004701 | NARASIN                               | 1 |
| 64 | SN01004586 | MYCOPHENOLIC_ACID                     | 1 |
| 65 | SN01004180 | MITOMYCIN                             | 1 |
| 66 | SN01005160 | METHYLENE_BLUE                        | 1 |
| 67 | SN01006275 | METHYL_GAMBOGATE                      | 1 |
| 68 | SN01005253 | MELENGESTROL_ACETATE                  | 1 |
| 69 | SN00852728 | MEBENDAZOLE                           | 1 |
| 70 | SN01004855 | LASALOCID_SODIUM                      | 1 |
| 71 | SN01005276 | IRINOTECAN_HYDROCHLORIDE              | 1 |
| 72 | SN01004348 | GRAMICIDIN_(GRAMICIDIN_A_SHOWN)       | 1 |
| 73 | SN01005838 | GITOXIGENIN_DIACETATE                 | 1 |
| 74 | SN01004346 | GENTIAN_VIOLET                        | 1 |
| 75 | SN01005060 | FLUVASTATIN_SODIUM                    | 1 |
| 76 | SN01005050 | FLUBENDAZOLE                          | 1 |
| 77 | SN01004812 | FLOXURIDINE                           | 1 |
| 78 | SN01004629 | FENBENDAZOLE                          | 1 |
| 79 | SN00838640 | ETOPOSIDE                             | 1 |
| 80 | SN01006195 | ERGOSTEROL                            | 1 |
| 81 | SN00844672 | EPIRUBICIN_HCL                        | 1 |
| 82 | SN01006396 | DIHYDROCELASTRYL_DIACETATE            | 1 |
| 83 | SN01006235 | DEOXSAPPANONE_B_7,4-DIMETHYL_ETHER    | 1 |
| 84 | SN01004276 | DAUNORUBICIN_HYDROCHLORIDE            | 1 |
| 85 | SN00852681 | DAUNORUBICIN_HCL                      | 1 |
| 86 | SN01004714 | CYCLOHEXIMIDE                         | 1 |
| 87 | SN00838670 | CLOFARABINE                           | 1 |

|     |            |                                      |   |
|-----|------------|--------------------------------------|---|
| 88  | SN00846345 | CICLOPIROX_OLAMINE                   | 1 |
| 89  | SN01006524 | CHLOROTHALONIL                       | 1 |
| 90  | SN01005579 | CETRIMONIUM_BROMIDE                  | 1 |
| 91  | SN01006361 | CELASTROL                            | 1 |
| 92  | SN01006089 | CEDRELONE                            | 1 |
| 93  | SN01005538 | BRONOPOL                             | 1 |
| 94  | SN01004904 | BLEOMYCIN_(BLEOMYCIN_B2_SHOWN)       | 1 |
| 95  | SN01004713 | AZACITIDINE                          | 1 |
| 96  | SN01005282 | ATRACURIUM_BESYLATE                  | 1 |
| 97  | SN01005292 | ARSENIC_TRIOXIDE_DIETHANOLAMINE_SALT | 1 |
| 98  | SN01005978 | ANTIMYCIN_A_(A1_SHOWN)               | 1 |
| 99  | SN01005941 | ANTHOTHECOL                          | 1 |
| 100 | SN01004953 | ALBENDAZOLE                          | 1 |
| 101 | SN00852805 | ADRIAMYCIN_HCL                       | 1 |
| 102 | SN01005432 | ACRIFLAVINIUM_HYDROCHLORIDE          | 1 |
| 103 | SN01006251 | 7-DESACETOXY-6,7-DEHYDROGEDUNIN      | 1 |

Primary screening identified 103 compounds in which normalized cell counts were <50% from control (DMSO) at a minimum of one dose point (0.05, 0.5, 5  $\mu$ M) in all four cell lines (AOC518.5 Clone D, E, 9 and 18B). Viability determined through DAPI staining following 72 h of treatment.
