# Supplementary material for: Phenotypic Consequences of SLC25A40-ABCB1 Fusions beyond Drug Resistance in High-Grade Serous Ovarian Cancer
Source: MDPI journal article supplement (doi:10.3390/cancers13225644), 2021-11-11
Supplement: s1 [file s1]

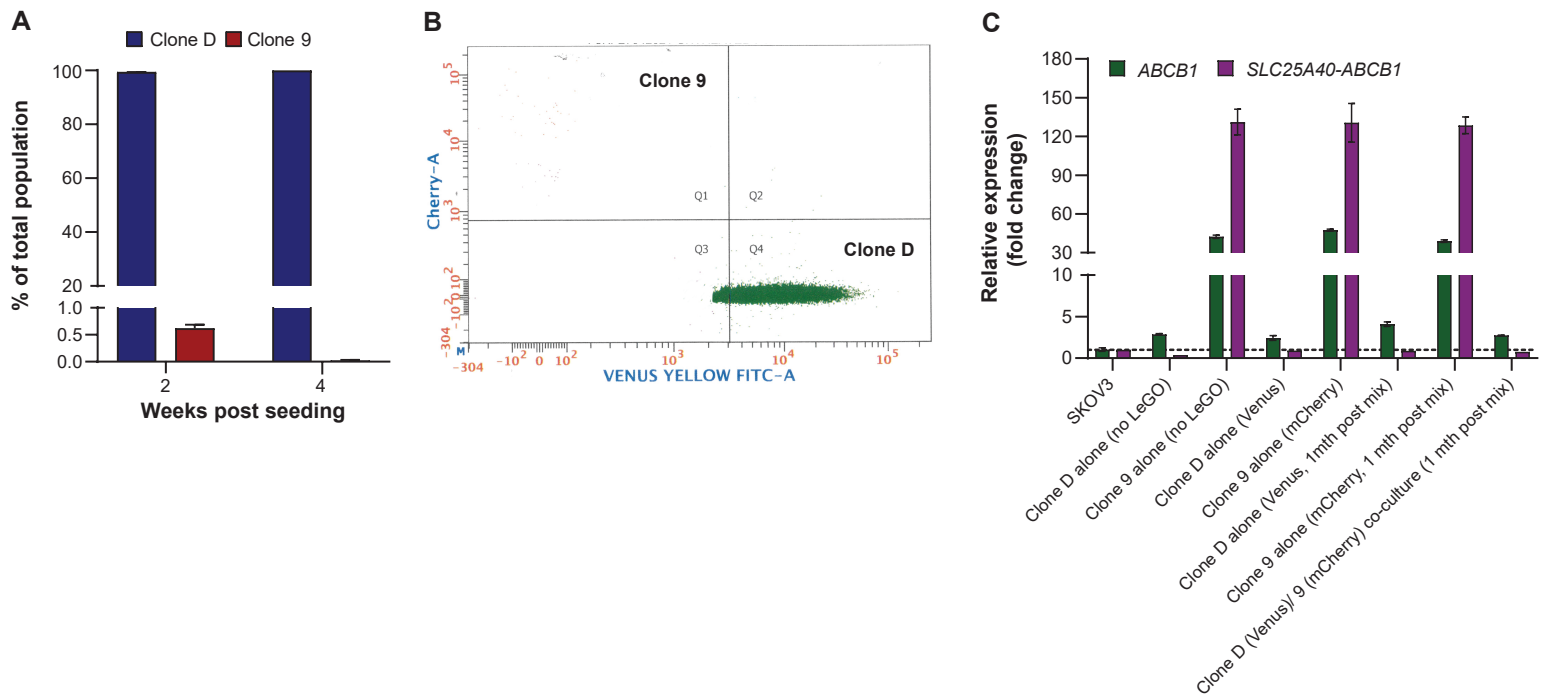

**Supplementary Fig. S6:** Fusion-negative cells outcompete the growth of *ABCB1* fusion-positive clones when co-cultured

(A) Percentage of total population of AOCs18.5 Clone D (fusion-negative, venus yellow) and Clone 9 (fusion-positive, mCherry) cells following two and four weeks post co-culture (50:50 mix). Data represents mean percentage  $\pm$  STDEV from duplicate flasks ascertained from FACS analysis. (B) Representative flow cytometry plot of venus yellow (Q4) and mCherry (Q1) cell sorting, two weeks post co-culture of Clone D and Clone 9 cells. (C) qRT-PCR analysis of *ABCB1* (green) and *SLC25A40-ABCB1* (purple) expression normalized to fusion-negative HGSOC SKOV3 cells. Data represents mean expression  $\pm$  STDEV from duplicate flasks. Transduction of Clone D and Clone 9 cells with LeGO vectors had no effect on basal *ABCB1* and *SLC25A40-ABCB1* expression levels.
