# Supplementary material for: Phenotypic Consequences of SLC25A40-ABCB1 Fusions beyond Drug Resistance in High-Grade Serous Ovarian Cancer
Source: MDPI journal article supplement (doi:10.3390/cancers13225644), 2021-11-11
Supplement: s1 [file s1]

**Supplementary Table S1:** Proliferation rates of AOCS-18.5 fusion-negative and positive clones

| AOCS-18.5 Line | Fusion Status         | Time to reach 50% confluence<br>(hrs) |
|----------------|-----------------------|---------------------------------------|
| Parental       | Positive <sup>#</sup> | 56.15 ± 3.75                          |
| Clone B        | Negative              | 70.06 ± 5.73                          |
| Clone C        | Negative              | 69.42 ± 2.11                          |
| Clone D        | Negative              | 61.81 ± 3.32                          |
| Clone E        | Negative              | 54.97 ± 4.67                          |
| Clone F        | Negative              | 54.66 ± 4.09                          |
| Clone 8        | Positive              | 155.38 ± 24.94                        |
| Clone 9        | Positive              | 143.66 ± 10.14                        |
| Clone 13       | Positive              | 118.79 ± 6.41                         |
| Clone 15B      | Positive              | 101.18 ± 2.88                         |
| Clone 18B      | Positive              | 157.70 ± 10.95                        |

<sup>#</sup> Cell line comprises approximately 40% fusion positive cells.

Data represents mean confluence ± SEM from a minimum of five independent IncuCyte experiments
