# Supplementary material for: Phenotypic Consequences of SLC25A40-ABCB1 Fusions beyond Drug Resistance in High-Grade Serous Ovarian Cancer
Source: MDPI journal article supplement (doi:10.3390/cancers13225644), 2021-11-11
Supplement: s1 [file s1]

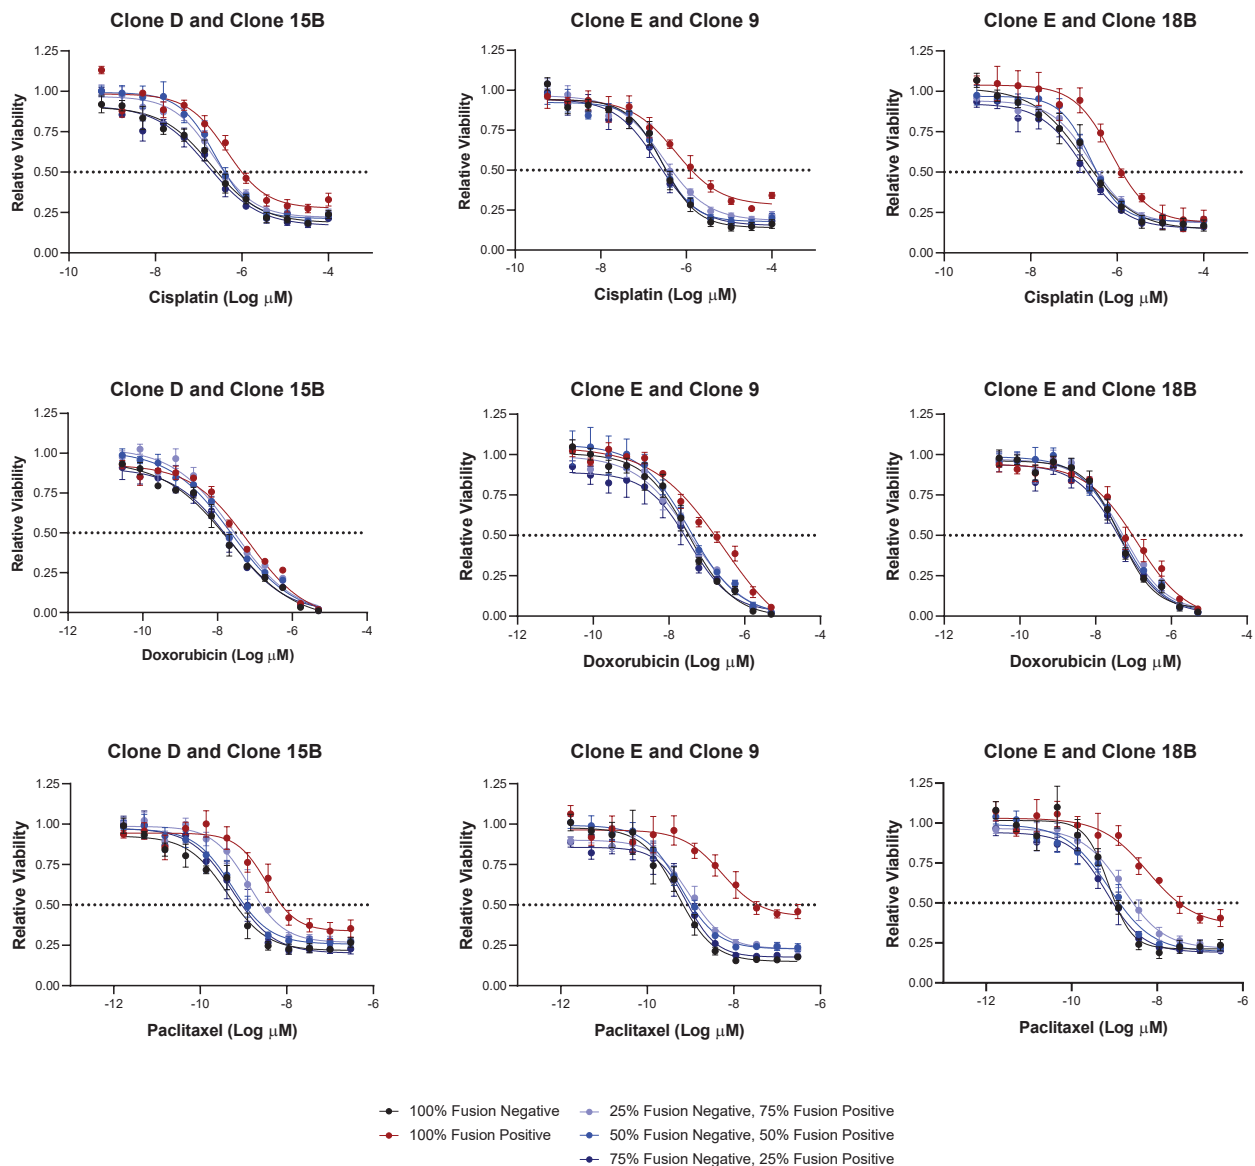

### Supplementary Fig. S7: Clonal composition influences drug sensitivity

*SLC25A40-ABC1* fusion negative (Clone D, Clone E) and fusion-positive (Clone 9, Clone 18B) clones were seeded alone or co-cultured in three different ratios (25:75, 50:50, 75:25) and treated with Cisplatin, Doxorubicin or Paclitaxel for 72hrs. Relative viability normalized to DMSO control was determined through DAPI staining. Data represents relative viability  $\pm$  SEM from a minimum of four independent experiments. Line denotes  $\text{IC}_{50}$ .
