# Supplementary material for: Phenotypic Consequences of SLC25A40-ABCB1 Fusions beyond Drug Resistance in High-Grade Serous Ovarian Cancer
Source: MDPI journal article supplement (doi:10.3390/cancers13225644), 2021-11-11
Supplement: s1 [file s1]

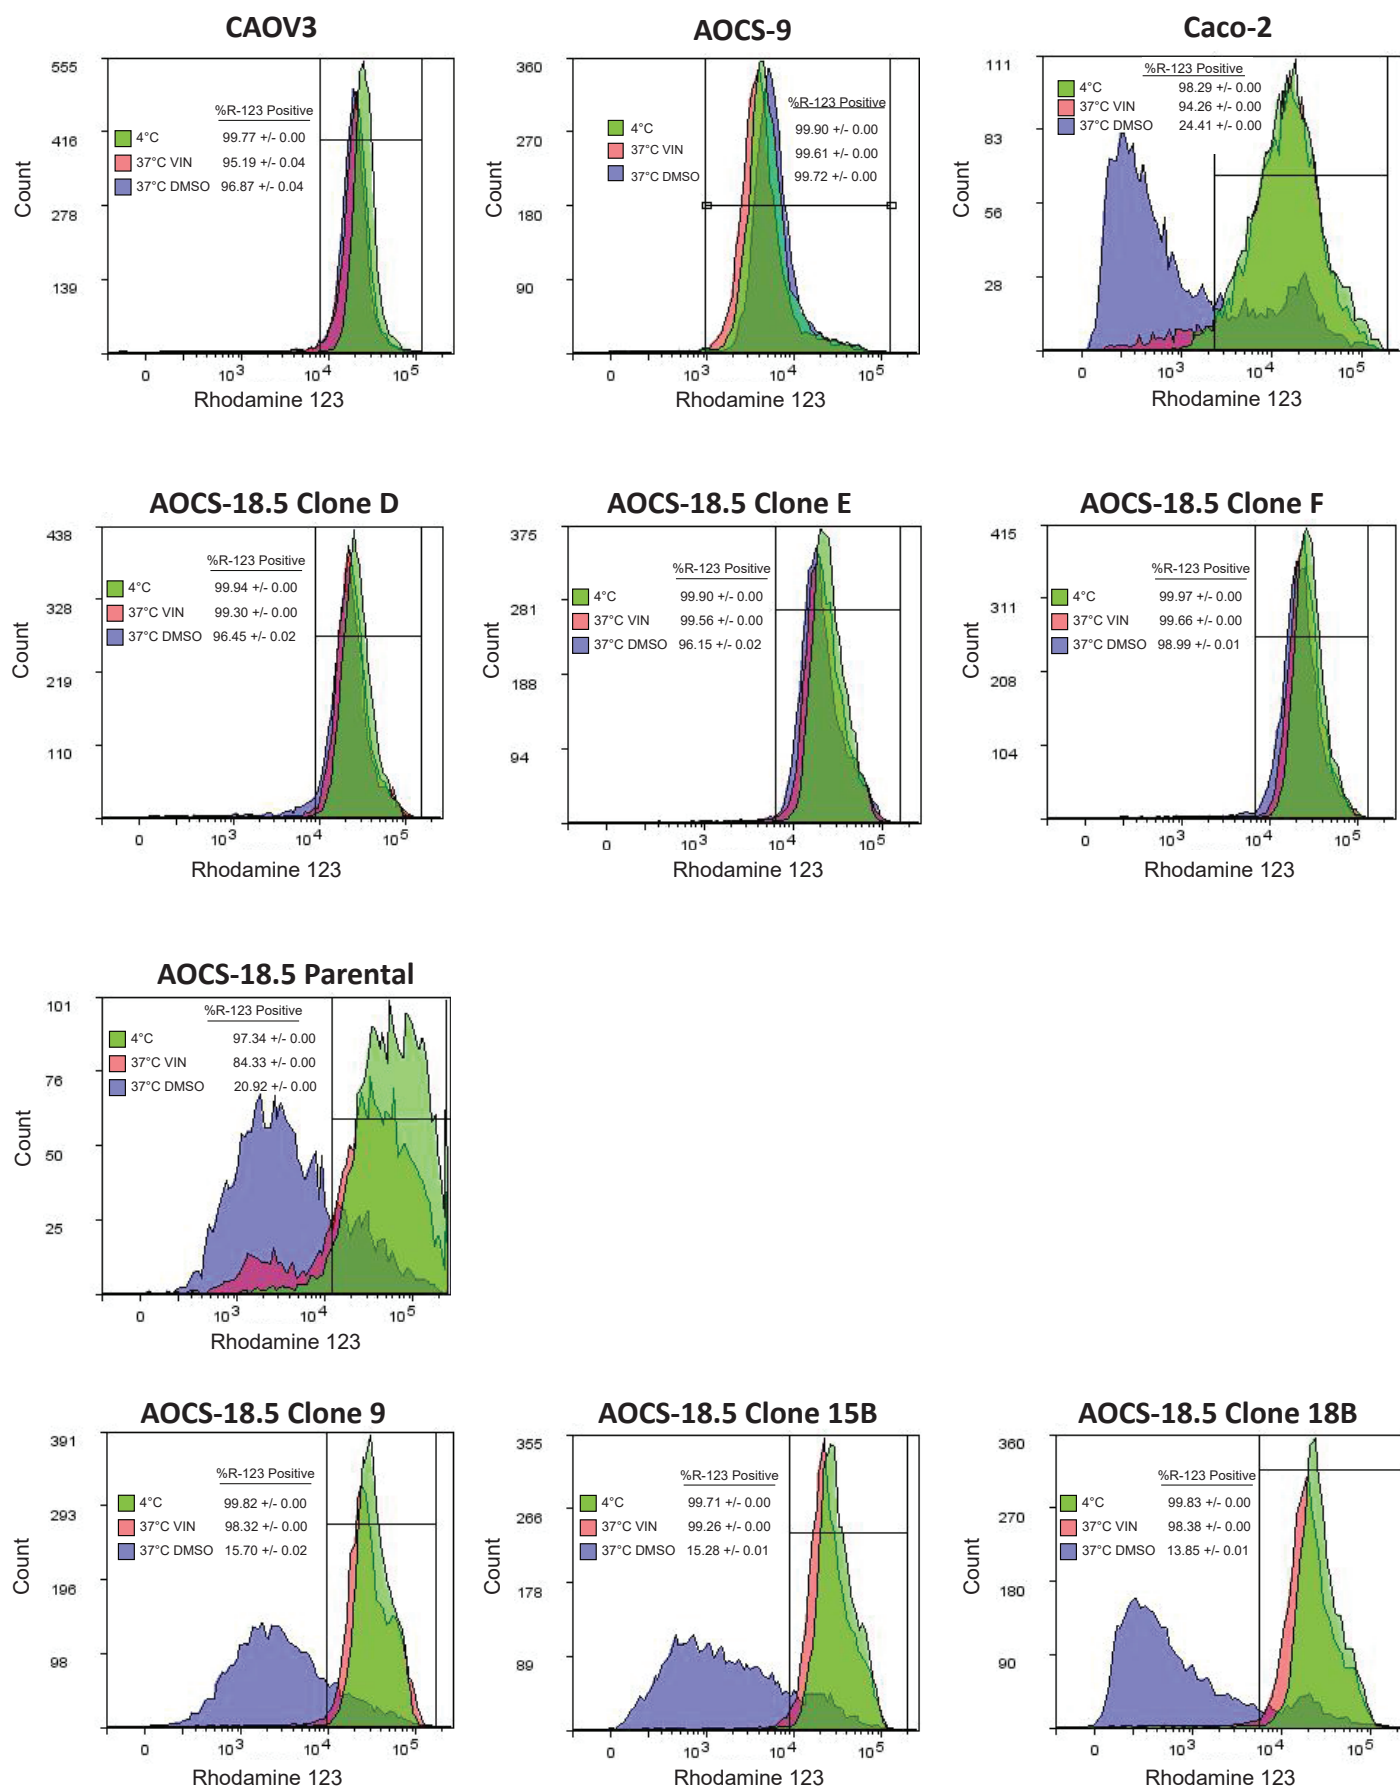

**Supplementary Fig. S2:** *SLC25A40-ABCB1* fusion-positive cells demonstrate increased efflux of *ABCB1* substrates

Representative flow cytometric analysis of rhodamine 123 efflux via P-gp in AOCS18.5 parental, and *SLC25A40-ABCB1* fusion-negative (Clone D, E, F) and fusion-positive (Clone 9, 15B, 18B) clones. CAOV3 and AOCS-9 used as fusion-negative HGSOC control lines. Caco-2, known *SLC25A40-ABCB1* fusion-negative, *ABCB1* overexpressing colon intestinal cell line used for *ABCB1* overexpression comparison. Cells were incubated with rhodamine 123 for 1 hr (4°C) followed by the following treatments: 4°C (green, P-gp inactive), 37°C with *ABCB1* competitive substrate Vinblastine (VIN) (pink), and 37°C DMSO (pink, P-gp active). Efflux was quantified in terms of the fraction of cells in the M1 region of the plot (low fluorescence). Data represents mean rhodamine 123 cellular retention ± STDEV from two independent experiments.
